# Supplementary material for: Past, present and future rainfall erosivity in Central Europe based on convection-permitting climate simulations
Source: Copernicus journal article supplement (doi:10.5194/hess-2023-120), 2023-05-11
Supplement: Supplementary file 1 [file hess-2023-120-supplement.pdf]

# Supplement to “Past, present and future rainfall erosivity in Central Europe based on convection-permitting climate simulations”

Magdalena Uber<sup>1</sup>, Michael Haller<sup>2</sup>, Christoph Brendel<sup>2</sup>, Gudrun Hillebrand<sup>1</sup>, Thomas Hoffmann<sup>1</sup>

<sup>1</sup>Department Fluvial Morphology, Sediment Dynamics and Management, Federal Institute of Hydrology, 56068 Koblenz, Germany

<sup>2</sup>Deutscher Wetterdienst, 63067 Offenbach am Main, Germany

Correspondence to: Magdalena Uber (uber@bafg.de)

## Supplement

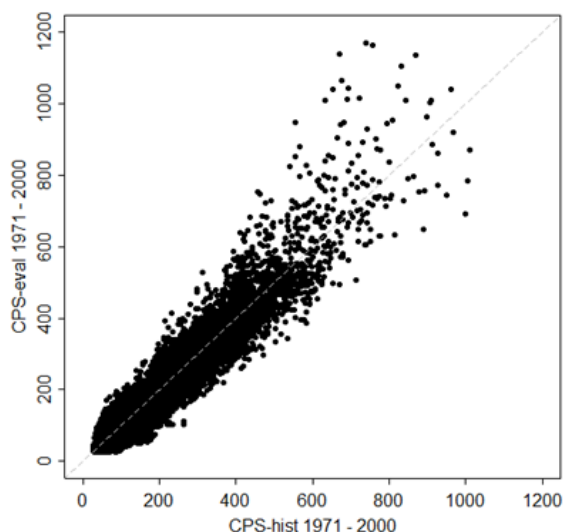

10 **Figure S1:** Comparison of average annual rainfall erosivity from 1971 - 2000 calculated from the evaluation simulation (CPS-eval) and with the historical projection simulations (CPS-hist). Each point in the scatter plot represents a grid point.

15 **Table S1:** Comparison of past and future changes in rainfall erosivity reported in the literature and calculated here (data from the projection run unless stated otherwise). The values from the other studies were either given in the text or tables, estimated from figures or extracted from reported data (see description of methodology below). For ease of comparison, we give the changes per decade and always assume linear trends. Note that while the spatial extent always matches, the temporal coverage can differ due to data availability. References: (1) Verstraeten et al., 2006; (2) Fiener et al., 2013 ;(3) Hanel et al., 2016; (4) Auerswald et al., 2019; (5) Auerswald et al., 2019b; (6) Wurbs and Steininger, 2011; (7) Gericke et al., 2019; (8) Panagos et al., 2017; (9) Panagos et al., 2022; (10) Köhn et al., 2022.

| Study | Change per decade [%] |
|-------|-----------------------|
|-------|-----------------------|

| Ref.                                       | Location                  | Precipitation data               | Temporal coverage | Other study | This study |
|--------------------------------------------|---------------------------|----------------------------------|-------------------|-------------|------------|
| <b>Past trends in rainfall erosivity</b>   |                           |                                  |                   |             |            |
| 1                                          | Ukkel, Belgium            | 1 rain gauge (10 min resolution) | 1971-2002         | 13.9        | 34.2       |
| 2                                          | Ruhr area, Germany        | 10 rain gauges (5 min)           | 1973-2007         | 21.0        | 23.2       |
| 3                                          | Czech Republic            | 17 rain gauges (30 min)          | 1962-2011         | 3.9         | 16.5       |
| 4                                          | Germany                   | contiguous radar data (60 min)   | 2001-2017         | 12.0        | 1.2        |
| 5                                          | Germany                   | ≥ 50 rain gauges                 | 1962-2017         | 14.0        | 17.1       |
| <b>Future trends in rainfall erosivity</b> |                           |                                  |                   |             |            |
| 6                                          | Germany                   | ECHAM5-WETTREG (SRES A1B)        | 1985-2055         | -0.4        | 3.9        |
| 6                                          | Germany                   | ECHAM5-WETTREG (SRES A1B)        | 1985-2085         | 0.8         | 6.3        |
| 7                                          | Brandenburg, Germany      | EURO-CORDEX ensemble (RCP 8.5)   | 2008-2038         | 5.0-11.0    | 5.3        |
| 7                                          | Brandenburg, Germany      | EURO-CORDEX ensemble (RCP 8.5)   | 2008-2078         | 2.0-8.0     | 8.4        |
| 8                                          | Germany                   | HadGem2 (RCP 4.5)                | 2010-2050         | 16.5        | 3.9        |
| 8                                          | Denmark                   | HadGem2 (RCP 4.5)                | 2010-2050         | 19.6        | 9.6        |
| 8                                          | Netherlands               | HadGem2 (RCP 4.5)                | 2010-2050         | 19.4        | 1.8        |
| 8                                          | Switzerland               | HadGem2 (RCP 4.5)                | 2010-2050         | 6.1         | 3          |
| 8                                          | Czech Republic            | HadGem2 (RCP 4.5)                | 2010-2050         | 17.2        | 4.5        |
| 9                                          | Germany                   | CMIP5 ensemble (RCP 8.5)         | 2010-2050         | 36.0        | 3.9        |
| 9                                          | Denmark                   | CMIP5 ensemble (RCP 8.5)         | 2010-2050         | 24.9        | 9.6        |
| 9                                          | Netherlands               | CMIP5 ensemble (RCP 8.5)         | 2010-2050         | 39.6        | 1.8        |
| 9                                          | Switzerland               | CMIP5 ensemble (RCP 8.5)         | 2010-2050         | 21.5        | 3          |
| 9                                          | Czech Republic            | CMIP5 ensemble (RCP 8.5)         | 2010-2050         | 23.5        | 4.5        |
| 10                                         | Mansfeld Südharz, Germany | EURO-CORDEX ensemble (RCP 8.5)   | 1995-2035         | 4.3         | 2.3        |
| 10                                         | Mansfeld Südharz, Germany | EURO-CORDEX ensemble (RCP 8.5)   | 1995-2085         | 2.4         | 8.4        |

20

Methods for obtaining the values in Table S1:

**Ref. 1) Ukkel, Belgium:** Annual R-factor values for the period 1971-2002 were extracted from Fig. 2 in Verstraeten et al., (2006) using WebPlotDigitizer (<https://automeris.io/WebPlotDigitizer/>, accessed 09/02/2023). A linear regression model was fitted to the data and the slope of the best fit was 1.2865 MJ mm ha<sup>-1</sup> h<sup>-1</sup> a<sup>-1</sup> per year. This corresponds to 1.39 % of the mean value during the same period per year and 13.9 % change per decade. From this study, annual R-factor values were extracted for the period 1971-2000 from the CPS-hist simulation run at the 9 grid cells surrounding Ukkel, Belgium. The 9 grid cells were averaged and the change rate per decade was calculated as for the data extracted from Verstraeten et al. (2006).

**Ref. 2) Ruhr area, Germany:** Fiener et al. (2013) state an increase of 21% change per decade between 1973 and 2007 in the abstract. From this study, annual R-factors were extracted for the period 1971-2000 from the CPS-hist simulation run at a rectangle which includes the locations of the raingauges shown in Fig. 1 of Fiener et al. (2013). The annual values were averaged over all grid cells included in this rectangle and a linear change rate per decade was calculated as described above. It has to be noted that Fiener et al. (2013) consider summer erosivity while we consider annual erosivity.

**Ref. 3) Czech Republic:** In Table 2 by Hanel et al. (2016), the authors give a mean change of 3.87 % per decade for annual rainfall erosivity (called EI30 by the authors) averaged over 17 rain gauges in the Czech Republic in the period 1962-2011. From this study, annual R-factor values were extracted for the period 1971-2000 from the CPS-hist simulation run at all grid cells in the Czech Republic. The spatial mean was calculated and the linear change rate per decade was calculated as described above.

**Ref. 4) Germany:** Annual R-factor values for the period 2001-2017 were extracted from Fig. 7 in Auerswald et al. (2019) using WebPlotDigitizer (<https://automeris.io/WebPlotDigitizer/>, accessed 09/02/2023). A linear change rate was calculated as described above. From this study, annual R-factor values were extracted for the period 2001 - 2017 from the CPS-eval evaluation run at all grid cells in Germany. Note that the change rate in the evaluation run was smaller than in the simulation run which was not available for the period 2001-2017.

**Ref. 5) Germany:** Auerswald et al. (2019b) state that the R-factor doubled between 1962 and 2017. 100% change in 5.5 decades corresponds to 18.2% change per decade, but this is with respect to the initial value of 1962, not with respect to the mean of the annual time series. Using the values of spatially averaged R-factors given in the text, we estimated a change rate of approx. 12 % per decade. From this study, annual R-factor values were extracted for the period 1971-2000 from the CPS-hist simulation run at all grid cells in the Germany.

**Ref. 6) Germany:** Wurbs and Steininger (2011) give an R-factor that is spatially averaged over Germany of 57.3 for the reference period 1971-2000 (central year 1985), an R-factor of 55.8 N h<sup>-1</sup> a<sup>-1</sup> for the near future 2041-2070 (central year 2055) and an R-factor of 62.0 for the far future 2071-2100 (central year 2085). This corresponds to a decrease of -0.4% of the value of the reference period for the near future and an increase of 0.8% for the far future. From this study, all grid cells in Germany were extracted from the R-factor maps for the historical period (CPS-hist), the near future (CPS-scen-nf) and the far future (CPS-scen-ff). All grid cells were spatially averaged and change rates per decade were calculated in percent of the mean value in the historical period.

55 **Ref. 7) Brandenburg, Germany:** The range of values given in the lower left subfigure of Fig. 6 in Gericke et al. (2019) was extracted with WebPlotDigitizer (<https://automeris.io/WebPlotDigitizer/>, accessed 09/02/2023) for the start years of 15-year intervals 2030 and 2070 (corresponding to central years 2038 and 2078). From this study, all grid cells in the German federal state of Brandenburg were extracted from the R-factor maps for the historical period (CPS-hist), the near future (CPS-scen-nf) and the far future (CPS-scen-ff) and rates of change per decade were calculated as described above. It has to be noted that the reference period differs considerably between this study (1971-2000) and the study by Gericke et al. (2019) (2000-2015).

60 **Ref. 8) Germany, Denmark, Czech Republic, Netherlands, Switzerland:** The values of change in R-factor given in Table 2 by Panagos et al. (2017) for the respective countries were transformed to changes per decade through division by the number of decades (four). From this study, all grid cells in the respective countries were extracted from the R-factor maps for the historical period (CPS-hist) and the near future (CPS-scen-nf) and rates of change per decade were calculated as described above. It has to be noted that the central year for the near future is similar in our study (2055) and the one of Panagos et al. (2017) (central year 2050) but the reference period differs considerably between the studies (central year 1985 in our study and 2010 in Panagos et al. (2017)).

65 **Ref. 9) Germany, Denmark, Czech Republic, Netherlands, Switzerland:** Change rates between 2010 and 2050 or 2070 are provided by Panagos et al. (2022) at <https://esdac.jrc.ec.europa.eu/content/global-rainfall-erosivity-projections-2050-and-2070> (accessed 09/02/2023). The values from the file 2010-2050-rcp8.5.tif were extracted for the respective countries, spatially averaged and divided by the number of decades. Change rates for this study are the same as for reference 8.

70 **Ref. 10) District of Mansfeld Südharz, Germany:** Köhn et al. (2022) state in the text of the paper that mean changes from the present (reference period 1971-2000) to the near future (2021-2050) and the far future are 17 % and 22 % respectively. Divided by the number of decades these values correspond to 4.3 % change per decade for the near future and 2.4 % for the far future. From this study, all grid cells in the German district of Mansfeld Südhrz were extracted from the R-factor maps for the historical period (CPS-hist), the near future (CPS-scen-nf) and the far future (CPS-scen-ff) and rates of change per decade were calculated as described above.

## References

80 Auerswald, K., Fischer, F., Winterrath, T., and Brandhuber, R.: Rain erosivity map for Germany derived from contiguous radar rain data, *HYDROL EARTH SYST SC*, 23, 1819-1832, <https://doi.org/10.5194/hess-23-1819-2019>, 2019a.

Auerswald, K., Fischer, F., Winterrath, T., Elhaus, D., Maier, H., and Brandhuber, R.: Klimabedingte Veränderung der Regenerosivität seit 1960 und Konsequenzen für Bodenabtragsschätzungen, in: *Bodenschutz, Ergänzbares Handbuch der Maßnahmen und Empfehlungen für Schutz, Pflege und Sanierung von Böden, Landschaft und Grundwasser*, edited by: Bachmann G., König W., Utermann J., Erich Schmidt Verlag, Berlin, Germany, 21 pp., 2019b.

- 85 Fiener, P., Neuhaus, P., and Botschek, J.: Long-term trends in rainfall erosivity—analysis of high resolution precipitation time series (1937–2007) from Western Germany, *AGR FOREST METEOROL*, 171, 115-123, <https://doi.org/10.1016/j.agrformet.2012.11.011>, 2013.
- Gericke, A., Kiesel, J., Deumlich, D., and Venohr, M.: Recent and future changes in rainfall erosivity and implications for the soil erosion risk in Brandenburg, NE Germany, *WATER-SUI*, 11, 904, <https://doi.org/10.3390/w11050904>, 2019.
- 90 Hanel, M., Pavlásková, A., and Kyselý, J.: Trends in characteristics of sub-daily heavy precipitation and rainfall erosivity in the Czech Republic, *INT J CLIMATOL*, 36, 1833-1845, <https://doi.org/10.1002/joc.4463>, 2016.
- Köhn, J., Beylich, M., Meißner, R., Rupp, H., and Reinstorf, F.: Regressionsmodelle zur Abschätzung eines klimawandelbeeinflussten zukünftigen Regenerositätsfaktors auf Basis von Monatswerten - Regression models for the evaluation of the rainfall factor with regard to climate change on the basis of monthly values, *HYDROL WASSERBEWIRTS*, 95, 66, 122-136, [https://doi.org/10.5675/HyWa\\_2022.3\\_2](https://doi.org/10.5675/HyWa_2022.3_2), 2022.
- Panagos, P., Ballabio, C., Meusburger, K., Spinoni, J., Alewell, C., and Borrelli, P.: Towards estimates of future rainfall erosivity in Europe based on REDES and WorldClim datasets, *J HYDROL*, 548, 251-262, <https://doi.org/10.1016/j.jhydrol.2017.03.006>, 2017.
- Panagos, P., Borrelli, P., Matthews, F., Liakos, L., Bezak, N., Diodato, N., and Ballabio, C.: Global rainfall erosivity 100 projections for 2050 and 2070, *J HYDROL*, 610, 127865, <https://doi.org/10.1016/j.jhydrol.2022.127865>, 2022.
- Verstraeten, G., Poesen, J., Demarée, G., and Salles, C.: Long-term (105 years) variability in rain erosivity as derived from 10-min rainfall depth data for Ukkel (Brussels, Belgium): Implications for assessing soil erosion rates, *J GEOPHYS RES-ATMOS*, 111, D22109, <https://doi.org/10.1029/2006JD007169>, 2006.
- Wurbs, D. and Steininger, M.: Wirkungen der Klimaänderungen auf die Böden. Untersuchungen zu Auswirkungen des 105 Klimawandels auf die Bodenerosion durch Wasser, Umweltbundesamt, Dessau-Roßlau, Germany, 225 pp., ISSN 1862-4804, 2011.
